# Supplementary material
Source: Springer Nature journal article supplement (https://www.springermedizin.de/resource/supplementary/12876_2009_444_MOESM1_ESM.pdf/9437026)
Supplement: MOESM1 [file 9437026]

**Group No.**

**Time course (days)**

0      10      20      30      40      50      60      70  
▼      ▼      ▼      ▼      ▼      ▼      ▼      ▼

---

**I**

**II**

**III**      {

**IV**     

**V**

**VI**     

**VII**      {

**VIII**     

**IX**     

**X**

**XI**      {

**XII**
